# Supplementary material
Source: publisher figshare collection journal article supplement (https://f1000.figshare.com/ndownloader/files/99903)
Supplement: Supplementary file 1 [file 99903]

Day	Phages	dt
1	T	6.229461709
1	T	6.279483303
1	T	6.209405151
1	T	6.127235345
1	P	4.071983854
1	P	5.472704718
1	P	5.492147571
1	P	5.542553454
1	P	4.886643433
1	P	5.554057642
1	P	5.528494413
1	P	5.767140741
1	P	5.406912544
1	P	5.141897364
1	2	5.801865124
1	2	5.352747837
1	2	5.892422616
1	2	5.834502143
1	2	5.600879264
1	2	6.319531128
1	2	7.417089342
1	2	5.899885439
1	2	6.395700527
1	2	4.905778395
1	10	6.557082426
1	10	6.307998096
1	10	6.531803582
1	10	6.339258299
1	10	4.564953779
1	10	7.723669383
1	10	8.994368536
1	10	4.183151079
1	10	5.833252979
1	10	4.966383628
2	P	6.949944384
2	P	6.102519687
2	P	5.062766787
2	P	6.187374282
2	P	6.311647553
2	P	5.719402399
2	P	5.567464366
2	P	4.807742051
2	P	5.650679549
2	P	6.310397115
2	2	6.851459599
2	2	6.444529184
2	2	6.365625901
2	2	6.016179445
2	2	6.054744118
2	2	5.801793067
2	2	5.495218893
2	2	6.980836518
2	2	5.718026766
2	2	5.757474097
2	10	6.325575365
2	10	7.253006095
2	10	5.924643689
2	10	6.713785164
2	10	4.439205105
2	10	4.426106732
2	10	6.582218963
2	10	5.233289235
2	10	5.15483577
2	10	5.760700687
2	T	4.933706169
2	T	3.439664489
2	T	3.673904935
2	T	3.345608274
2	T	3.071036338
2	T	3.741209958
3	P	8.954461375
3	P	12.54017509
3	P	12.60479152
3	P	8.71833778
3	P	11.44844662
3	P	10.15671052
3	P	10.4779873
3	P	8.471306599
3	P	9.195602867
3	P	7.057185324
3	2	8.872038888
3	2	8.562584927
3	2	9.667623346
3	2	9.105045401
3	2	7.730893983
3	2	9.076255583
3	2	6.91621588
3	2	8.170585988
3	2	7.547558697
3	2	6.745878943
3	10	10.1712209
3	10	10.68275566
3	10	11.79805299
3	10	10.15275569
3	10	8.932581605
3	10	10.5860297
3	10	10.12523615
3	10	8.899576818
3	10	9.398643274
3	10	8.460296822
3	T	6.483281222
3	T	4.202097971
3	T	4.083600482
3	T	5.742798371
3	T	3.790180047
3	T	5.318562938
4	P	3.615750925
4	P	3.36486603
4	P	3.421273477
4	P	3.527116511
4	P	3.660098276
4	P	3.563055382
4	P	3.557217413
4	P	3.451513809
4	P	3.375401642
4	P	3.252393957
4	2	4.152961995
4	2	4.112181644
4	2	3.754405197
4	2	3.996928543
4	2	3.874200014
4	2	3.798712297
4	2	3.365277093
4	2	3.520619854
4	2	3.129777855
4	2	3.128430336
4	10	3.712830002
4	10	3.755364424
4	10	3.851927814
4	10	3.845059539
4	10	3.516729934
4	10	4.118694613
4	10	3.599980415
4	10	3.334124927
4	10	3.332941711
4	10	3.345782242
4	T	4.329469539
4	T	3.359625524
4	T	3.719792038
4	T	4.019910703
4	T	3.369947258
4	T	3.660239812
